# Supplementary material for: Exogenous 2-(3,4-Dichlorophenoxy) triethylamine ameliorates the soil drought effect on nitrogen metabolism in maize during the pre-female inflorescence emergence stage
Source: BMC Plant Biol. 2019 Mar 19;19:107. doi: 10.1186/s12870-019-1710-5 (PMC6425708; doi:10.1186/s12870-019-1710-5)
Supplement: Supplementary file 6 — Research data. (XLSX 99 kb) [file 12870_2019_1710_MOESM6_ESM.xlsx]

## Sheet: Sheet1
	Sheet1: Fig. 3 data. Changes in the soil water content (SWC) in 2016 and 2017.
	Sheet2: Fig. 5 data. Changes in the grain number plant-1 and grain yield plant-1 (g) of maize in 2016 and 2017.
	Sheet3: Fig. 7 data. Effect of drought and/or DCPTA treatment on the relative growth rate (RGR) of the shoots and roots of the maize in 2016 and 2017.
	Sheet4: Fig. 8 data. Effect of drought and/or DCPTA treatment on root length density (RLD) and root surface area density (RSD) for different soil depths on the 20th day and 30th day after treatment in 2016 and 2017.
	Sheet5: Fig. 9 data. Effect of drought and/or DCPTA treatment on root hydraulic conductivity, the flow rate of root-bleeding sap and the NO3- delivery rate in 2016 and 2017.
	Sheet6: Fig. 10 data. Effect of drought and/or DCPTA treatment on relative water content of the leaves (RLWC) in 2016 and 2017.
	Sheet7: Fig. 11 data. Effect of drought and/or DCPTA treatment on the gas exchange parameters in the maize leaves in 2016 and 2017.
	Sheet8: Fig. 13 data. Effects of drought and/or DCPTA treatment on isocitrate dehydrogenase (ICDH) activity in 2016 and 2017.
	Sheet9: Fig. 14 data. Effects of drought and/or DCPTA treatment on the nitrate (NO3-), nitrite (NO2-) and ammonium (NH4+) contents in the leaves of maize in 2016 and 2017.
	Sheet10: Fig. 15 data. Effects of drought and/or DCPTA treatment on nitrate reductase (NR) and nitrite reductase (NiR) activities in the leaves of maize in 2016 and 2017.
	Sheet11: Fig. 16 data. Effects of drought and/or DCPTA treatment on the glutamine synthetase (GS), glutamate synthase (GOGAT) and glutamate dehydrogenase (GDH) activities in the leaves of maize in 2016 and 2017.
	Sheet12: Fig. 17 data. Effects of drought and/or DCPTA treatment on the alanine aminotransferase (AlaAT) and aspartate aminotransferase (AspAT) activities in the leaves of maize in 2016 and 2017.
	Sheet13: Fig. 18 data. Effects of drought and/or DCPTA treatment on the protease activity and protein and free amino acid contents in the leaves of maize in 2016 and 2017.
	Fig. 3 data. Changes in the soil water content (SWC) in 2016 and 2017.
	Indicator	Year	Day after stress	Well-watered					Well-watered					Drought					Drought+DCPTA
	SWC(%)	2016	0	87.7	87.5	85.55	87.8	80.44	87.45	86.13	82.47	82.4	80.03	82.89	80.5	81.2	83.67	86.44	84.37	84	87.82	83.87	84.61
			5	79.64	79.84	76.49	79.29	83.16	81.23	80.5	81.32	77.7	72.06	73.3	65.33	63.17	67.16	66.6	70.45	64.81	70.45	72.07	68.81
			10	80.5	82.5	73.03	85.03	86.5	80.32	83.74	80.09	83.74	88.2	55	52.08	50.75	51.21	57.5	43.18	49.97	50.2	52.48	49.97
			15	76.85	80.66	74.69	80.66	80.34	79.99	76.89	75.43	79.75	72.99	31.85	30.42	28.91	38.91	34.23	33.4	31.72	39.63	38.71	34.09
			20	82.2	83.44	80.91	84.41	86.91	83.92	82.61	76.24	85.33	82.45	29.17	29.67	22.24	21.32	20.39	28.13	30.39	24.36	29.6	21.83
			25	76.87	78.37	79.03	82.61	75.75	82.44	80	81.06	80	77.73	81.31	82.16	83.56	79.8	79.8	83.53	80.96	83.5	84.01	86.81
			30	81	82.5	80.5	80.5	85.5	83.2	85.03	83.8	85.94	83.2	88.5	79.25	82.03	80.03	82.5	80.8	83.86	79.01	82.26	86.26
		2017	0	86.59	86.39	84.46	86.69	79.42	89.09	88.36	89.18	85.6	80.03	81.84	79.48	80.17	82.61	85.34	83.3	82.93	86.71	82.8	83.53
			5	85.54	85.74	82.43	85.2	89.02	86.07	85.35	86.17	82.59	77.02	62.5	54.63	52.5	56.44	55.89	53.69	48.11	53.69	55.29	52.06
			10	77.47	79.44	70.09	81.93	83.39	76.29	79.67	76.06	79.67	84.07	44.3	41.42	40.11	40.56	46.77	38.63	45.34	45.56	47.81	45.34
			15	84.76	88.53	82.63	88.53	88.2	86.82	83.76	82.32	86.59	79.91	27.45	26.04	24.54	34.42	29.79	24.98	23.32	31.13	30.22	25.65
			20	77.15	78.37	75.88	79.33	81.8	82.79	81.5	75.21	84.18	81.34	28.8	29.3	21.96	21.05	20.13	21.77	24	18.05	23.22	15.55
			25	88.55	88.35	86.43	88.65	81.38	87.05	86.32	87.14	83.56	77.99	85.19	86.03	87.42	83.7	83.7	83.38	80.84	83.36	83.86	86.62
			30	77.94	79.42	77.44	77.44	82.38	80.11	81.92	80.7	82.82	80.11	79.38	80.12	82.86	80.88	83.33	83.65	86.67	81.88	85.09	89.04

## Sheet: Sheet2
Fig. 5 data. Changes in the grain number plant-1 and grain yield plant-1 (g) of maize in 2016 and 2017.
Indicator	Treatment	2016					2017
Grains number plant-1	Well-watered	485	476	488	503	468	456	450	436	454	462
	Well-watered+DCPTA	534	511	506	510	504	487	498	473	468	480
	Drought	359	343	354	311	346	293	314	317	280	303
	Drought +DCPTA	444	427	421	391	397	379	389	397	361	358
Grain yield plant-1 (g)	Well-watered	186.67	188.5	184.49	181.04	193.1	166.09	167.9	161.31	160.53	175.06
	Well-watered+DCPTA	195.01	204.95	197.73	210.25	194.08	178.3	176.53	176.97	188.36	177.35
	Drought	128.79	127.34	128.63	116.24	114.71	106.29	102.19	112.44	93.96	98.46
	Drought +DCPTA	142.39	156.69	150.01	160.16	156.66	115.83	131.26	131.91	138.62	142.6

## Sheet: Sheet3
Fig. 7 data. Effect of drought and/or DCPTA treatment on the relative growth rate (RGR) of the shoots and roots of the maize in 2016 and 2017.
RCR(g DW day-1)	Year	Days during drought period	Well-watered					Well-watered					Drought					Drought+DCPTA
Shoot	2016	0~5	0.0903	0.0931	0.0905	0.1028	0.0936	0.0902	0.0993	0.091	0.0958	0.0894	0.0843	0.0884	0.0806	0.0931	0.0883	0.0833	0.0901	0.0872	0.0974	0.0873
		5~10	0.0983	0.1031	0.1005	0.1072	0.1036	0.1102	0.0993	0.1049	0.0983	0.0953	0.0821	0.0765	0.0856	0.0847	0.083	0.0933	0.0858	0.0894	0.0866	0.0817
		10~15	0.095	0.0981	0.0973	0.1078	0.0986	0.1107	0.1008	0.0968	0.1071	0.0973	0.0712	0.0645	0.0682	0.0707	0.0637	0.0712	0.0645	0.0682	0.0707	0.0637
		15~20	0.1033	0.1093	0.0955	0.1018	0.0986	0.1167	0.1143	0.1083	0.1141	0.1078	0.0428	0.0452	0.0532	0.0548	0.0467	0.0723	0.0727	0.0725	0.0661	0.0726
		20~25	0.0965	0.0981	0.0955	0.1051	0.0986	0.1067	0.1091	0.1095	0.1018	0.1074	0.0582	0.0452	0.0525	0.0547	0.0567	0.0723	0.0767	0.0637	0.0731	0.0697
		25~30	0.1075	0.108	0.1007	0.1078	0.1	0.114	0.1143	0.1121	0.1171	0.1084	0.0682	0.0645	0.0645	0.0548	0.0637	0.0908	0.0996	0.0907	0.1001	0.0901
	2017	0~5	0.1091	0.1082	0.0969	0.0998	0.1007	0.1017	0.1106	0.1029	0.1007	0.1033	0.0967	0.1033	0.0941	0.0918	0.0988	0.0992	0.0953	0.0967	0.1039	0.1042
		5~10	0.0951	0.0914	0.0976	0.1014	0.1011	0.0939	0.0984	0.1063	0.0962	0.0955	0.0495	0.0537	0.06	0.0505	0.0513	0.0753	0.0757	0.0712	0.0758	0.0624
		10~15	0.0837	0.0814	0.0811	0.0942	0.0836	0.1011	0.0933	0.0935	0.0994	0.0923	0.053	0.0428	0.0409	0.0421	0.042	0.053	0.0428	0.0409	0.0421	0.042
		15~20	0.0839	0.0839	0.0866	0.0796	0.0791	0.0893	0.0893	0.0946	0.088	0.0873	0.0265	0.0208	0.03	0.0358	0.0307	0.0647	0.0502	0.0509	0.0522	0.0538
		20~25	0.0876	0.0841	0.0914	0.0917	0.0836	0.0964	0.0948	0.1005	0.0993	0.0915	0.0399	0.0214	0.0292	0.0313	0.0375	0.067	0.0667	0.0542	0.0654	0.0656
		25~30	0.096	0.0924	0.0928	0.0862	0.0836	0.0957	0.1002	0.1002	0.1086	0.092	0.0496	0.0467	0.0401	0.0358	0.0444	0.0756	0.078	0.0747	0.0868	0.08
Root	2016	0~5	0.0349	0.036	0.035	0.0378	0.0362	0.0354	0.0377	0.0344	0.0393	0.0357	0.0388	0.0418	0.0408	0.0391	0.0408	0.0417	0.0391	0.0381	0.0398	0.0387
		5~10	0.0386	0.036	0.035	0.0389	0.0362	0.0354	0.034	0.0344	0.0393	0.0357	0.0448	0.0429	0.0456	0.0426	0.0414	0.0451	0.0464	0.0455	0.0422	0.0411
		10~15	0.0349	0.036	0.035	0.0395	0.0362	0.0368	0.0382	0.0394	0.0393	0.0357	0.0358	0.0341	0.0382	0.0331	0.0338	0.0358	0.0341	0.0382	0.0331	0.0338
		15~20	0.0379	0.0387	0.035	0.0377	0.0362	0.0412	0.0389	0.0393	0.0405	0.0423	0.0194	0.02	0.0206	0.0201	0.0153	0.028	0.0285	0.0258	0.0281	0.0262
		20~25	0.0351	0.033	0.0321	0.0349	0.0332	0.0366	0.0356	0.0382	0.0352	0.0374	0.0216	0.0193	0.022	0.0192	0.0192	0.032	0.0295	0.0289	0.0283	0.0297
		25~30	0.0393	0.036	0.0369	0.0395	0.0374	0.039	0.0387	0.0414	0.038	0.0419	0.0255	0.0243	0.0236	0.0213	0.0232	0.0316	0.0337	0.0358	0.0343	0.032
	2017	0~5	0.0343	0.0381	0.0338	0.0384	0.035	0.0345	0.0354	0.0342	0.0374	0.0357	0.0436	0.0395	0.0373	0.0403	0.039	0.0382	0.0437	0.0417	0.0394	0.0416
		5~10	0.0422	0.0416	0.0419	0.0418	0.0438	0.0448	0.0413	0.0387	0.0425	0.0396	0.0467	0.0443	0.0487	0.0439	0.0382	0.0471	0.0471	0.0473	0.0443	0.044
		10~15	0.0459	0.0448	0.0454	0.0433	0.0489	0.048	0.0485	0.046	0.0517	0.0492	0.0407	0.0397	0.0423	0.0392	0.0404	0.0407	0.0397	0.0423	0.0392	0.0404
		15~20	0.0464	0.0443	0.0449	0.0415	0.0445	0.0442	0.0481	0.0484	0.0507	0.0484	0.0141	0.0149	0.0157	0.0166	0.0129	0.0289	0.0253	0.0237	0.0253	0.0248
		20~25	0.0381	0.0408	0.0396	0.0378	0.0411	0.0442	0.0415	0.0415	0.0435	0.0464	0.0166	0.0201	0.017	0.018	0.0205	0.0307	0.0271	0.0264	0.0252	0.0274
		25~30	0.0398	0.0354	0.0367	0.04	0.0373	0.0414	0.0399	0.043	0.0396	0.043	0.024	0.022	0.0212	0.0186	0.0206	0.0298	0.0326	0.0353	0.0333	0.0303

## Sheet: Sheet4
Fig. 8 data. Effect of drought and/or DCPTA treatment on root length density (RLD) and root surface area density (RSD) for different soil depths on the 20th day and 30th day after treatment in 2016 and 2017.
Indicator	Year	Days after stress	Soil depth(cm)	Well-watered					Well-watered					Drought					Drought+DCPTA
Root length density (cm cm-3)	2016	20	0~10	2.828	2.5196	2.849	2.926	2.8	3.283	3.038	3.234	3.332	3.4104	1.7493	1.9247	1.4072	1.932	1.624	1.9206	1.8736	1.7564	2.1404	1.9736
			10~20	1.1389	1.1907	1.0919	1.2608	1.0899	1.4138	1.3746	1.239	1.2397	1.386	0.5129	0.581	0.795	0.646	0.7109	0.8668	0.6301	0.9158	0.8668	0.9158
			20~30	0.8749	0.9065	0.9555	0.8749	1.1219	0.9498	0.9008	1.2173	1.1968	1.1375	0.2408	0.278	0.3146	0.2253	0.4199	0.7952	0.6183	0.6069	0.642	0.6579
			30~40	0.6498	0.7482	0.5522	0.5522	0.5438	0.8879	0.7899	0.6719	0.6468	0.7409	0.168	0.112	0.2275	0.1377	0.2377	0.5944	0.5454	0.5347	0.567	0.3984
			40~50	0.5669	0.679	0.5669	0.483	0.4753	0.6299	0.539	0.5319	0.6299	0.7315	0.2097	0.2422	0.1435	0.105	0.1932	0.239	0.2194	0.3849	0.3849	0.2174
			50~60	0.3289	0.3409	0.3289	0.4249	0.2799	0.4116	0.3072	0.4753	0.4361	0.35	0.119	0.1862	0.2352	0.1828	0.168	0.1465	0.1411	0.2097	0.196	0.3406
			60~70	0.3004	0.273	0.2429	0.3134	0.2152	0.2401	0.2239	0.2435	0.2303	0.2416	0.2205	0.2205	0.1223	0.1715	0.1715	0.2146	0.2152	0.2155	0.1607	0.1947
			70~80	0.1435	0.1288	0.1435	0.1442	0.1798	0.1254	0.112	0.161	0.1288	0.112	0.1426	0.1456	0.091	0.1461	0.1463	0.1446	0.1468	0.0711	0.1446	0.1703
			80~90	0.0595	0.0698	0.0613	0.1085	0.105	0.0881	0.0973	0.091	0.1407	0.1455	0.0812	0.0914	0.077	0.077	0.0812	0.0938	0.084	0.0966	0.0559	0.0973
			90~100	0.0534	0.0462	0.0412	0.021	0.07	0.0518	0.0567	0.0469	0.0623	0.0595	0.0457	0.021	0.0483	0.0224	0.0469	0.0224	0.0238	0.0291	0.0469	0.0487
		30	0~10	3.0825	2.7463	3.1054	3.1893	3.052	3.5784	3.3114	3.5251	3.6318	3.7173	1.9067	1.9889	1.5338	1.9968	1.7702	2.0935	2.3692	1.9798	2.333	2.3692
			10~20	1.6774	1.7339	1.6261	1.8102	1.624	1.977	1.9343	1.7865	1.7873	1.9467	0.9951	1.0693	1.3025	1.1401	1.2109	1.4898	1.4498	1.4342	1.5988	1.4342
			20~30	1.1716	1.2061	1.2595	1.1716	1.4409	1.2533	1.1999	1.5448	1.5225	1.4579	0.8075	0.739	0.5609	0.8995	0.6757	1.1938	1.0811	0.9885	0.9178	0.9351
			30~40	0.7083	0.8156	0.6019	0.6019	0.5927	0.9678	0.861	0.7324	0.705	0.8076	0.4142	0.449	0.248	0.3014	0.259	0.7024	0.649	0.6374	0.6725	0.4887
			40~50	0.618	0.7401	0.618	0.5265	0.5181	0.6866	0.5875	0.5798	0.6866	0.7973	0.2286	0.264	0.1564	0.1144	0.2106	0.4786	0.4572	0.6376	0.6376	0.455
			50~60	0.3585	0.3716	0.3585	0.4631	0.3051	0.4486	0.3349	0.5181	0.4753	0.3815	0.1297	0.203	0.2564	0.1993	0.1831	0.1597	0.1538	0.2286	0.2136	0.3712
			60~70	0.3274	0.2976	0.2648	0.3416	0.2345	0.2617	0.2441	0.2654	0.251	0.2633	0.2403	0.2403	0.1333	0.1869	0.1869	0.2339	0.2346	0.2349	0.1752	0.2122
			70~80	0.2218	0.2058	0.2218	0.2226	0.2613	0.2021	0.1875	0.2409	0.2058	0.1875	0.1772	0.1805	0.121	0.181	0.1813	0.1794	0.1818	0.0992	0.1794	0.2075
			80~90	0.1303	0.1415	0.1322	0.1837	0.1798	0.1615	0.1715	0.1646	0.2187	0.224	0.1103	0.1214	0.1057	0.1057	0.1103	0.124	0.1133	0.1271	0.0827	0.1279
			90~100	0.1236	0.1158	0.1103	0.0883	0.1417	0.1219	0.1272	0.1165	0.1333	0.1302	0.0716	0.0447	0.0744	0.0462	0.0729	0.0462	0.0477	0.0535	0.0729	0.0749
	2017	20	0~10	2.1796	1.9417	2.1958	2.2552	2.158	2.5306	2.3416	2.4928	2.5684	2.6289	1.8946	1.8984	1.7984	1.6578	1.7178	1.8653	1.7519	1.6069	1.572	1.7519
			10~20	1.2546	1.2945	1.2183	1.3486	1.2168	1.4666	1.4364	1.3318	1.3323	1.4452	0.8341	0.7394	0.5606	0.5606	0.6606	0.7423	0.6368	0.7801	0.7423	0.7801
			20~30	0.6729	0.6973	0.7351	0.6729	0.7863	0.8079	0.7701	0.937	0.9213	0.8755	0.1876	0.2896	0.2407	0.1718	0.3219	0.5752	0.5159	0.4299	0.457	0.3921
			30~40	0.4993	0.5752	0.424	0.424	0.4175	0.6829	0.6073	0.5163	0.497	0.5695	0.1276	0.0373	0.1735	0.1813	0.1813	0.4321	0.3631	0.2811	0.4091	0.3809
			40~50	0.4353	0.5218	0.4353	0.3706	0.3647	0.4839	0.4138	0.4083	0.4839	0.5623	0.1598	0.1848	0.1087	0.029	0.147	0.2123	0.3972	0.3706	0.3706	0.4728
			50~60	0.3175	0.3276	0.3175	0.3992	0.2757	0.3879	0.299	0.4421	0.4087	0.3354	0.0898	0.1416	0.1794	0.2105	0.1276	0.1202	0.1222	0.1488	0.2782	0.1497
			60~70	0.1809	0.1615	0.1401	0.1902	0.1205	0.1382	0.1267	0.1406	0.1312	0.1392	0.1681	0.1681	0.0923	0.1303	0.1303	0.1636	0.164	0.1642	0.122	0.1482
			70~80	0.0696	0.0592	0.0696	0.0701	0.0953	0.0568	0.0472	0.082	0.0592	0.0472	0.108	0.1103	0.0682	0.1107	0.1109	0.1095	0.1112	0.0528	0.1095	0.1294
			80~90	0.01	0.0173	0.0112	0.0448	0.0423	0.0303	0.0368	0.0323	0.0676	0.071	0.0606	0.0685	0.0574	0.0574	0.0606	0.0703	0.0628	0.0725	0.0411	0.0731
			90~100	0.0002	0.0173	0.002	0.0163	0.001	0.0163	0.0153	0.0116	0.001	0.0023	0.0392	0.0336	0.0298	0.0142	0.052	0.038	0.0417	0.0342	0.0461	0.0439
		30	0~10	2.2112	1.9639	2.228	2.2898	2.1887	2.5761	2.3797	2.5369	2.6154	2.6783	1.6264	1.6659	1.9247	1.9226	1.6906	1.8041	2.0666	1.9158	1.8795	2.0666
			10~20	1.5348	1.5763	1.4971	1.6325	1.4955	1.8048	1.7238	1.615	1.6156	1.733	1.1927	1.1893	1.0985	1.0034	1.1074	1.4003	1.2906	1.5436	1.5042	1.2316
			20~30	0.6447	0.6701	0.7094	0.6447	0.7626	0.6793	0.6616	0.9193	0.9029	0.8553	0.1361	0.2462	0.1953	0.1237	0.2798	0.5431	0.6894	0.4961	0.4202	0.3528
			30~40	0.4642	0.5431	0.3859	0.3859	0.3791	0.6551	0.5765	0.4819	0.4618	0.5372	0.0778	0.0328	0.1255	0.1336	0.2845	0.4983	0.459	0.4505	0.4764	0.3411
			40~50	0.3977	0.4876	0.3977	0.3304	0.3242	0.4482	0.3753	0.3696	0.4482	0.5297	0.1112	0.0422	0.0581	0.0272	0.1931	0.3737	0.358	0.3304	0.3304	0.4366
			50~60	0.2751	0.2857	0.2751	0.3601	0.2318	0.3483	0.2559	0.4047	0.37	0.2938	0.0384	0.0924	0.1317	0.1639	0.0777	0.0701	0.0721	0.0998	0.2343	0.1007
			60~70	0.2132	0.193	0.1708	0.2228	0.1503	0.1687	0.1568	0.1713	0.1615	0.1698	0.1198	0.1198	0.0411	0.0806	0.0806	0.1151	0.1156	0.1159	0.0719	0.0992
			70~80	0.0975	0.0866	0.0975	0.098	0.1242	0.0841	0.0742	0.1104	0.0866	0.0742	0.0574	0.0598	0.016	0.0602	0.0603	0.0589	0.0607	0.0505	0.0589	0.0796
			80~90	0.0355	0.0431	0.0368	0.0716	0.069	0.0566	0.0634	0.0587	0.0954	0.099	0.0281	0.0363	0.0248	0.0248	0.0281	0.0382	0.0304	0.0405	0.0078	0.0411
			90~100	0.0002	0.0173	0.002	0.0163	0.001	0.0163	0.0153	0.0116	0.001	0.0023	0.0392	0.0336	0.0298	0.0142	0.052	0.038	0.0417	0.0342	0.0461	0.0439
Root surface area density (cm2cm-3)	2016	20	0~10	0.4242	0.3779	0.4273	0.4389	0.42	0.4924	0.4557	0.4851	0.4998	0.5116	0.2624	0.2887	0.2111	0.2898	0.2436	0.2881	0.281	0.2635	0.3211	0.296
			10~20	0.1708	0.1786	0.1638	0.1891	0.1635	0.2121	0.2062	0.1858	0.186	0.2079	0.0769	0.0871	0.1192	0.0969	0.1066	0.13	0.1095	0.1374	0.13	0.1374
			20~30	0.1312	0.136	0.1433	0.1312	0.1683	0.1425	0.1351	0.1826	0.1795	0.1706	0.0361	0.0417	0.0472	0.0338	0.063	0.1193	0.0927	0.091	0.0963	0.0987
			30~40	0.0975	0.1122	0.0828	0.0828	0.0816	0.1332	0.1185	0.1008	0.097	0.1111	0.0352	0.0168	0.0341	0.0206	0.0356	0.0892	0.0818	0.0802	0.085	0.0598
			40~50	0.085	0.1018	0.085	0.0724	0.0713	0.0945	0.0809	0.0798	0.0945	0.1097	0.0375	0.0408	0.0215	0.0157	0.029	0.0359	0.0329	0.0577	0.0577	0.0326
			50~60	0.0493	0.0511	0.0493	0.0637	0.042	0.0617	0.0461	0.0713	0.0654	0.0525	0.0178	0.0279	0.0353	0.0274	0.0252	0.022	0.0212	0.0315	0.0294	0.0511
			60~70	0.0451	0.0409	0.0364	0.047	0.0323	0.036	0.0336	0.0365	0.0345	0.0362	0.0331	0.0331	0.0183	0.0257	0.0257	0.0322	0.0323	0.0323	0.0241	0.0292
			70~80	0.0215	0.0193	0.0215	0.0216	0.027	0.0188	0.0168	0.0241	0.0193	0.0168	0.0214	0.0218	0.0136	0.0219	0.0219	0.0217	0.022	0.0107	0.0217	0.0256
			80~90	0.0089	0.0105	0.0092	0.0163	0.0157	0.0132	0.0146	0.0136	0.0211	0.0218	0.0122	0.0137	0.0115	0.0115	0.0122	0.0141	0.0126	0.0145	0.0084	0.0146
			90~100	0.008	0.0069	0.0062	0.0031	0.0105	0.0078	0.0085	0.007	0.0093	0.0089	0.0069	0.0031	0.0072	0.0034	0.007	0.0034	0.0036	0.0044	0.007	0.0073
		30	0~10	0.4594	0.4093	0.4628	0.4754	0.4549	0.5033	0.4936	0.4739	0.5313	0.5041	0.2842	0.3127	0.2286	0.3139	0.2638	0.3584	0.3369	0.3828	0.3477	0.3206
			10~20	0.185	0.1934	0.1774	0.2048	0.1953	0.2397	0.2233	0.2085	0.2014	0.2252	0.1441	0.1612	0.1292	0.1633	0.1477	0.1625	0.172	0.1836	0.1907	0.1836
			20~30	0.1421	0.1473	0.1552	0.1421	0.1823	0.1543	0.1463	0.1978	0.1944	0.1848	0.049	0.0452	0.0511	0.0706	0.0871	0.1292	0.1004	0.0986	0.1043	0.1069
			30~40	0.1056	0.1216	0.0897	0.0897	0.0883	0.1442	0.1283	0.1092	0.1051	0.1204	0.0416	0.0182	0.037	0.0121	0.0386	0.1088	0.0983	0.0869	0.0921	0.0647
			40~50	0.0921	0.0778	0.0822	0.0883	0.0493	0.121	0.0876	0.0864	0.1023	0.1188	0.0406	0.0442	0.0233	0.0171	0.0314	0.0388	0.0357	0.0625	0.0625	0.0353
			50~60	0.0534	0.0554	0.0534	0.069	0.0455	0.0762	0.0499	0.0772	0.0708	0.0569	0.0193	0.0303	0.0382	0.0297	0.0273	0.0238	0.0229	0.0341	0.0318	0.0553
			60~70	0.0488	0.0444	0.0395	0.0509	0.035	0.067	0.0842	0.0396	0.0467	0.0392	0.0358	0.0358	0.0199	0.0279	0.0279	0.0349	0.035	0.035	0.0261	0.0316
			70~80	0.0233	0.0209	0.0233	0.0234	0.0292	0.0204	0.0182	0.0262	0.0209	0.0182	0.0232	0.0237	0.0148	0.0237	0.0238	0.0235	0.0238	0.0115	0.0235	0.0277
			80~90	0.0097	0.0113	0.01	0.0176	0.0171	0.0143	0.0158	0.0148	0.0229	0.0236	0.0132	0.0149	0.0125	0.0125	0.0132	0.0152	0.0136	0.0157	0.0091	0.0158
			90~100	0.0087	0.0075	0.0067	0.0034	0.0114	0.0084	0.0092	0.0076	0.0101	0.0097	0.0074	0.0034	0.0078	0.0036	0.0076	0.0036	0.0039	0.0047	0.0076	0.0079
	2017	20	0~10	0.3239	0.2883	0.3264	0.3353	0.3207	0.3766	0.3482	0.3709	0.3823	0.3913	0.2812	0.2818	0.2668	0.2457	0.2547	0.2768	0.2598	0.238	0.2328	0.2598
			10~20	0.1852	0.1912	0.1797	0.1993	0.1795	0.217	0.2125	0.1968	0.1969	0.2138	0.1221	0.1079	0.0811	0.0811	0.0961	0.1383	0.1225	0.114	0.1383	0.144
			20~30	0.0979	0.1016	0.1073	0.0979	0.1149	0.1182	0.1125	0.1376	0.1352	0.1283	0.0246	0.0404	0.0331	0.0228	0.0453	0.0833	0.0744	0.0615	0.0655	0.0558
			30~40	0.0719	0.0833	0.0606	0.0606	0.0596	0.0994	0.0881	0.0744	0.0715	0.0824	0.0361	0.0097	0.023	0.0242	0.0242	0.0768	0.0711	0.0699	0.0736	0.0541
			40~50	0.0623	0.0753	0.0623	0.0526	0.0517	0.0696	0.0591	0.0582	0.0696	0.0813	0.031	0.0147	0.0133	0.0088	0.0191	0.0588	0.0566	0.0526	0.0526	0.0679
			50~60	0.0446	0.0461	0.0446	0.0569	0.0384	0.0552	0.0418	0.0633	0.0583	0.0473	0.0105	0.0182	0.0239	0.0286	0.0161	0.015	0.0153	0.0193	0.0387	0.0195
			60~70	0.0241	0.0212	0.018	0.0255	0.0151	0.0177	0.016	0.0181	0.0167	0.0179	0.0222	0.0222	0.0108	0.0165	0.0165	0.0215	0.0216	0.0216	0.0153	0.0192
			70~80	0.0074	0.0059	0.0074	0.0075	0.0113	0.0055	0.0041	0.0093	0.0059	0.0041	0.0132	0.0135	0.0072	0.0136	0.0136	0.0134	0.0137	0.0049	0.0134	0.0164
			80~90	0.0015	0.0004	0.0013	0.0037	0.0033	0.0015	0.0025	0.0019	0.0071	0.0077	0.0061	0.0073	0.0056	0.0056	0.0061	0.0076	0.0064	0.0079	0.0032	0.008
			90~100	0.003	0.0056	0.0027	0.0055	0.0028	0.0055	0.0053	0.0047	0.0028	0.0027	0.0029	0.002	0.0015	0.0009	0.0048	0.0027	0.0033	0.0021	0.0039	0.0036
		30	0~10	0.3776	0.3705	0.3613	0.3123	0.3546	0.4324	0.4023	0.4037	0.4281	0.3792	0.2525	0.2892	0.2504	0.2663	0.2558	0.3139	0.3334	0.2845	0.3013	0.2926
			10~20	0.2096	0.2283	0.194	0.2175	0.2382	0.2433	0.2518	0.2496	0.2944	0.2636	0.1244	0.122	0.1327	0.0979	0.1307	0.1429	0.1865	0.1896	0.159	0.19
			20~30	0.1191	0.1304	0.1397	0.1542	0.1489	0.1645	0.1904	0.171	0.1731	0.1941	0.055	0.0536	0.0851	0.0663	0.0497	0.156	0.1117	0.092	0.1257	0.1144
			30~40	0.0963	0.0986	0.084	0.1143	0.0828	0.1275	0.137	0.1191	0.0944	0.114	0.0133	0.0183	0.0391	0.0206	0.0335	0.0914	0.0488	0.0832	0.0507	0.0798
			40~50	0.0821	0.0538	0.086	0.0903	0.0734	0.0903	0.0822	0.1133	0.0947	0.1006	0.0207	0.0266	0.0552	0.0008	0.0065	0.0289	0.0635	0.0597	0.0716	0.0685
			50~60	0.0703	0.0639	0.0553	0.0499	0.0674	0.0478	0.0709	0.0575	0.0649	0.0384	0.0316	0.0275	0.0296	0.0317	0.0145	0.0396	0.0136	0.0447	0.0082	0.0045
			60~70	0.0182	0.0173	0.015	0.0224	0.0126	0.0131	0.0152	0.0135	0.0052	0.0133	0.0284	0.0185	0.0123	0.0117	0.013	0.0136	0.0177	0.0136	0.0102	0.0149
			70~80	0.0042	0.001	0.0044	0.0009	0.0005	0.0015	0.0004	0.003	0.0002	0.0032	0.0077	0.0081	0.0033	0.0082	0.0007	0.0007	0.0083	0.0116	0.008	0.0115
			80~90	0.0036	0.0009	0.0023	0.0036	0.0041	0.0062	0.0101	0.0058	0.0032	0.0011	0.0008	0.0006	0.0037	0.0014	0.0009	0.0096	0.004	0.0045	0.0043	0.0014
			90~100	0.0015	0.0028	0.0012	0.0026	0.0012	0.0026	0.0015	0.0014	0.0014	0.0007	0.0046	0.0056	0.0025	0.0091	0.0015	0.0033	0.0042	0.0054	0.0034	0.0038

## Sheet: Sheet5
Fig. 9 data. Effect of drought and/or DCPTA treatment on root hydraulic conductivity, the flow rate of root-bleeding sap and the NO3- delivery rate in 2016 and 2017.
Indicator	Year	Day after stress	Well-watered					Well-watered					Drought					Drought+DCPTA
Root hydraulic conductivity (10-8 m3 m-2 s-1 MPa-1)	2016	0	17.41	17.94	18.62	17.29	18.12	17.68	18.33	17.72	16.34	17.29	17.37	18.15	16.83	18.07	17.55	17.93	17.51	18.68	17.37	17.77
		5	18.3	17.08	18.4	18.3	18.2	18.35	18.2	17.28	18.19	17.07	15.68	16.65	15.79	15.51	15.31	15.84	16.23	17.37	16	15.88
		10	17.53	17.33	18.83	17.98	18.28	17.49	18.29	19.72	17.44	18.76	14.04	13.15	14.64	14.66	14.06	16.16	15.34	15.33	16.79	15.24
		15	17.06	18.66	17.49	17.96	18.43	19.97	18.59	18.8	18.49	18.96	13.33	13.32	12.09	13.44	12.59	16.15	14.69	15.96	14.53	15.8
		20	17.1	18.39	18.48	18.64	18.35	18.7	19.91	19.97	18.94	19.84	12.21	12.54	12.24	11.85	11	14.64	15.21	15.99	14.29	14.54
		25	17.93	18.67	18.27	18.81	17.08	19.95	20.37	19.23	19.13	18.98	13.03	12.82	13.23	12.07	13.29	15.84	15.46	15.49	14.17	15.89
		30	17.2	18.8	18.34	18.75	18.47	19.95	18.94	20.48	19.73	19.43	14.19	15	14.22	15.92	14.49	16.06	15.83	17.32	16.95	16.36
	2017	0	16.44	15.92	15.57	15.21	17.2	16.23	15.85	17.18	15.86	15.8	15.88	15.14	15.3	15.56	17.08	17	15.45	16.73	15.85	16.82
		5	15.91	14.06	14.93	14.81	15.8	15.96	14.71	13.7	14.69	15.49	11.05	9.37	10.07	9.76	10.64	11.21	10.55	11.83	10.3	12.26
		10	15.06	13.75	14.85	14.46	15.88	15.02	14.8	15.7	13.87	16.41	10.25	8.85	9.81	9.83	10.27	12.56	10.58	10.57	11.49	11.56
		15	14.29	14.21	12.93	13.44	15.05	15.97	14.12	14.36	14.02	15.63	9.47	8.37	7.83	8.51	8.66	11.55	9.87	10.58	9.69	11.17
		20	14.56	13.05	14	14.18	14.96	15.34	15.57	15.64	14.51	16.59	8.25	7.51	7.19	6.76	7.77	10.9	10.44	10.36	9.43	10.8
		25	14.51	14.21	13.78	13.37	14.37	16.71	16.07	14.82	14.72	15.65	9.15	7.82	8.27	7.74	9.43	12.21	10.71	10.74	10.4	12.27
		30	14.11	14.36	13.86	14.31	15.39	15.71	14.51	15.1	15.37	16.14	10.41	10.2	9.35	10.4	10.75	12.45	11.12	11.65	11.82	12.78
Flow rate of root bleeding sap (ml h-1 root-1)	2016	0	4.02	4.59	4.48	4.38	4.71	4.01	4.59	4.2	4.59	4.26	4	4.65	4.15	4.62	4.46	4.02	4.33	4.7	4.44	4.41
		5	4	4.22	4.57	4.54	4.51	4.44	4.72	4.1	4.39	4.67	3.51	3.07	3.55	3.46	3.74	3.16	3.1	3.67	3.05	3.27
		10	4.42	4.36	4.67	4.01	4.65	4.58	4.83	5.1	4.57	4.98	2.39	2.06	2.01	2.59	2.4	3.18	2.55	2.92	3.19	2.89
		15	4.24	4.54	4.17	4.75	4.46	4.77	4.56	5	4.32	4.67	1.33	1.72	1.17	1.37	1.1	3.06	2.44	2.81	2.55	2.95
		20	4.03	4.53	4.06	4.41	4.52	4.55	4.94	4.96	4.63	4.91	1.16	0.96	1.07	1.34	0.72	2.22	2.69	2.02	2.35	2.19
		25	3.77	4.38	4.25	4.42	4.11	4.78	4.9	4.45	4.42	4.37	1.36	1.11	1.91	1.26	1.44	2.72	2.6	2.61	2.19	2.74
		30	4.01	4.6	4.36	4.49	4.4	4.79	4.96	4.32	4.72	4.37	2.39	2.94	2.9	2.99	2.78	3.63	3.56	3.72	3.76	3.08
	2017	0	5.43	5.79	5.1	5.71	5.5	5.4	5.69	5.15	5.67	5.24	5.71	5.19	5.8	5.59	5.83	5.5	5.13	5.81	5.48	5.43
		5	5.55	4.93	5.39	5.34	5.3	5.47	5.41	5.03	5.4	5.77	3.11	2.53	3.15	3.04	2.95	3.3	3.22	4.01	3.36	3.45
		10	4.66	4.38	4.99	4.85	4.97	4.88	5.2	5.54	4.86	5.4	2.55	2.12	2.06	2.81	2.56	3.44	2.61	3.1	3.45	3.06
		15	5.22	5.6	5.01	5.57	5.5	5.9	5.62	5.71	5.09	5.78	1.43	1.94	1.22	1.48	1.12	3.16	2.35	2.83	2.49	3.01
		20	4.64	5.07	5.11	5.17	5.06	5.2	5.6	5.82	5.3	5.57	1.2	0.95	1.09	1.44	0.63	2.59	3.2	2.32	2.45	2.55
		25	4.82	5.39	5.23	5.45	5.04	5.78	5.95	5.48	5.45	5.83	1.46	1.68	2.19	1.34	1.57	3.24	3.08	3.1	2.55	3.26
		30	4.77	5.42	5.11	5.27	5.06	5.14	5.7	5.48	5.58	5.32	3.19	3.52	3.02	3.59	3.66	4.42	4.33	4.53	4.59	4
NO3- delivery rate (μg h-1 root-1)	2016	0	508.35	573.81	549.19	531.26	596.09	501.36	617.55	569.67	558.44	555.09	597.59	505.39	610.36	568.38	568.89	570.69	585.12	569.61	526.14	508.51
		5	541.46	583.07	566.3	507.45	509.54	527.26	562.4	600.07	520.7	596.11	495.13	477.55	542.24	463.12	531.81	523.85	491.89	569.29	489.13	535.31
		10	506.98	588.35	566.88	544.3	525.33	666.58	654.56	564.89	604.87	626.02	445.8	427.53	374.39	354.32	418.57	455.16	415.26	463.31	512.67	481.2
		15	517.44	538.99	476.43	458.27	494.06	574.23	632.54	554.94	557.07	564	214.43	233.48	196	136.81	174.59	319.51	376.66	377.05	415.56	377.6
		20	496.51	543.43	495.34	575.23	562.74	588.62	677.23	649.54	628.11	591.93	86.1	134.56	142.91	79.95	182.53	266.52	266.89	345.82	323.78	350.24
		25	474.6	520.71	541.74	575.23	540.02	551.34	637.23	594.98	608.11	623.77	86.1	117.28	142.91	197.44	165.25	288.36	386.22	345.82	323.78	352.96
		30	562.91	612.55	579.02	525.12	560.02	675.02	657.23	701.38	610.83	626.49	289.4	288.45	214.33	214.15	204.23	387.98	406.48	418.2	488.83	470.52
	2017	0	521.77	551.6	535.45	523.68	596.22	523.74	580.29	548.88	591.51	539.31	549.55	545.89	548.84	590.32	521.87	547.52	532.95	575.58	598.03	548.37
		5	547.34	591.9	562	527.25	528.48	538.95	559.7	581.94	535.07	599.6	368.75	357.22	412.78	328.07	392.82	387.6	366.63	437.41	364.82	395.12
		10	474.95	548.33	533.93	499.43	486.98	579.66	571.77	496.69	539.17	553.04	296.39	284.4	249.53	223.25	278.53	302.53	276.35	307.88	363.7	319.61
		15	533.15	575.88	508.94	504.12	519.35	566.68	625.21	555.29	556.55	560.65	250.2	282.7	238.11	199.27	224.06	286.33	343.83	324.09	369.36	324.45
		20	468.07	498.86	467.31	532.85	511.53	528.51	593.52	568.48	554.42	530.68	166	197.79	203.27	161.97	229.27	264.69	284.62	336.4	321.94	352.42
		25	466.5	516.76	530.55	539.41	529.42	536.86	613.21	565.49	574.1	584.38	156	186.46	203.27	239.05	217.93	298.7	362.91	366.4	321.94	341.09
		30	522.68	576.86	530.39	504.61	521.3	567.01	557.55	611.02	532.89	541.22	299.39	298.76	237.01	250.01	230.38	364.07	376.2	383.89	443.35	418.22

## Sheet: Sheet6
Fig. 10 data. Effect of drought and/or DCPTA treatment on relative water content of the leaves (RLWC) in 2016 and 2017.
Indicator	Year	Day after stress	Well-watered					Well-watered					Drought					Drought+DCPTA
RLWC (%)	2016	0	87.65	94.43	92.74	91	95.35	87.05	96.5	93.25	96.55	90.99	87.4	98.5	93.87	95.08	92.36	87.38	89.15	98.34	94.07	93.52
		5	87.71	90.04	96.23	93.7	93.17	95.93	91.17	88.31	88.12	91.68	76.55	84.55	83.12	81.64	80.59	89.35	85.44	79.66	84.2	83.58
		10	89.62	88.59	93.86	92	83.58	88.35	92.56	96.92	88.1	95.08	73.88	72.44	67.05	77.14	73.98	89.03	80.74	80.7	85.15	80.19
		15	90.73	95.6	85.42	91.88	94.38	96.53	85.93	91.06	89.42	91.91	70.14	60.13	67.51	70.76	66.26	84.98	77.32	80.77	76.47	83.16
		20	86.39	84.55	91.98	92.85	91.34	85.89	94.26	94.59	89.14	93.91	54.25	65.98	64.44	62.37	61.96	77.05	86.07	79.7	75.23	76.55
		25	84.13	92.98	90.9	95.75	88.47	93.97	96.15	90.13	85.66	88.87	68.59	59.45	69.64	67.07	69.96	83.35	89.39	81.54	79.86	83.61
		30	91.61	95.63	86.65	90.8	89.33	91.86	91.94	82.38	90.66	89.11	74.69	78.94	84.84	79.89	76.28	84.51	93.33	85.92	86.73	86.11
	2017	0	92.85	97.43	94.42	96.19	89.99	89.89	94.67	92.38	90.04	95.89	89.59	91.68	99.86	94.18	93.44	90.6	96.09	93.9	89.55	91.87
		5	94.97	87.01	94.82	93.67	92.96	92.75	84.61	88.97	92.89	90.93	78.56	82.63	79.33	77.32	74.54	80.88	77.48	85.72	80.8	81.19
		10	89.5	88.1	96.53	91.37	92.16	90.14	88.12	94.32	85.56	93.06	64.31	62.37	69.97	68.74	63.09	82.63	76.1	76.34	82.08	75.35
		15	93.45	84.56	90.09	87.88	91.25	89.65	96.25	87.87	91.21	94.6	61.72	63.06	55.44	65.27	55.11	75.65	65.34	73.65	71.55	74.53
		20	86.92	94.44	93.77	87.5	93.96	87.83	84.3	91.81	92.52	90.48	58.7	62.51	57.72	52.2	54.34	71.1	76.43	74.69	66.03	71.77
		25	94.04	98.58	88.84	86.6	87.12	83.12	94.06	89.89	91.38	88.94	59.63	54.08	61.05	54.84	64.19	82.35	76.98	77.18	72.2	79.99
		30	82.6	97.59	85.12	87.79	85.98	92.82	89.2	96.03	87.62	81.97	60.3	73.09	68	71.78	69.79	79	75.05	74.74	85.22	77.97

## Sheet: Sheet7
Fig. 11 data. Effect of drought and/or DCPTA treatment on the gas exchange parameters in the maize leaves in 2016 and 2017.
Indicator	Year	Day after stress	Well-watered					Well-watered					Drought					Drought+DCPTA
Pn (μmol CO2 m-2 s-1)	2016	0	23.38	24.13	23.67	23.2	24.37	23.77	24.67	24.08	24.42	23.2	22.84	24.88	24.21	24.3	23.33	24.11	23.54	25.14	24.03	23.88
		5	23.93	22.9	24.11	23.93	23.78	24.75	24.99	25.83	24.45	22.79	18.9	19.71	19.06	18.66	18.11	19.12	19.68	20.81	19.35	19.18
		10	26.36	23.66	24.84	24.45	24.3	26.5	26.42	25.13	26.48	26.74	13.71	13.49	12.48	12.41	11.96	18.62	17.4	17.33	18.59	17.25
		15	25.22	24.28	26.05	26.07	25.37	26.45	28.47	25.49	27.05	26.8	11.9	11.99	13	13.27	12.09	17.04	17.71	16.26	17.27	16.82
		20	25.13	25.64	26.21	25.22	26.36	26.14	27.29	27.87	27.21	27.33	11.33	10.65	12.56	11.13	10.89	16.94	16.07	17.41	15.57	17.17
		25	24.64	25.79	26.22	23.83	24.98	27.77	27.01	27.78	26.46	26.54	13.53	12.37	12.35	13.4	12.74	18.33	17.26	18.75	17.39	18.7
		30	26.08	26.08	24.78	26.24	25.67	27.36	28.39	26.13	27.57	28.14	13.47	14.61	13.51	14.75	13.38	21.81	21.34	22.91	21.66	22.9
	2017	0	24.66	25.74	24.96	25.3	23.9	24.27	25.01	24.56	24.1	25.25	24.21	25.29	24.86	25.18	24.46	25	24.43	26.52	24.41	24.77
		5	24.82	23.31	25.5	24.82	24.68	24.88	24.41	23.65	24.66	24.28	21.86	23.16	22.01	21.62	20.58	21.57	22.63	24.25	22.3	22.14
		10	24	23.73	24.59	24.97	24.52	22.9	24.51	24.67	25.83	25.18	18.24	17.53	16.53	16.47	15.52	23.05	21.38	20.84	22.55	21.24
		15	21.8	23.32	22.68	23.33	24.4	24.77	25.17	24.12	24.29	23.94	12.56	13.05	14.04	14.71	13.15	20.03	21.44	18.51	20.25	19.81
		20	23.07	23.19	23.42	23.59	21.79	23.91	24.31	25.82	24.61	24.87	12.4	11.53	13.81	12.2	11.96	17.92	17.07	18.63	16.35	18.16
		25	21.89	22.89	22.08	23.09	22.97	24.23	23.16	24.17	24.95	23.54	15.1	13.42	12.87	14.44	13.78	19.29	18.25	20.14	17.94	19.66
		30	24.17	21.95	22.48	23.05	23.66	24.82	24.35	22.97	24.01	24.81	14.51	15.63	14.55	16.09	14.1	20.73	19.95	22.13	20.58	21.81
Gs (μmol CO2 m-2 s-1)	2016	0	0.24	0.24	0.24	0.24	0.23	0.24	0.25	0.24	0.24	0.23	0.24	0.23	0.25	0.24	0.24	0.24	0.23	0.25	0.24	0.24
		5	0.24	0.24	0.25	0.25	0.24	0.23	0.25	0.23	0.24	0.25	0.16	0.16	0.15	0.14	0.14	0.18	0.17	0.2	0.2	0.19
		10	0.24	0.23	0.25	0.24	0.24	0.23	0.26	0.25	0.25	0.26	0.09	0.1	0.1	0.09	0.09	0.17	0.16	0.18	0.15	0.17
		15	0.24	0.25	0.24	0.25	0.25	0.27	0.25	0.26	0.26	0.27	0.09	0.09	0.09	0.09	0.08	0.16	0.18	0.17	0.16	0.17
		20	0.24	0.23	0.25	0.24	0.24	0.26	0.25	0.26	0.25	0.26	0.08	0.08	0.07	0.06	0.07	0.15	0.14	0.15	0.15	0.16
		25	0.23	0.25	0.25	0.24	0.24	0.26	0.27	0.27	0.25	0.26	0.1	0.11	0.09	0.08	0.09	0.17	0.16	0.17	0.16	0.17
		30	0.23	0.22	0.23	0.24	0.22	0.24	0.25	0.24	0.25	0.24	0.11	0.12	0.11	0.13	0.14	0.17	0.17	0.18	0.18	0.19
	2017	0	0.23	0.24	0.23	0.23	0.24	0.24	0.24	0.24	0.24	0.23	0.24	0.26	0.25	0.25	0.24	0.24	0.23	0.25	0.24	0.24
		5	0.22	0.23	0.24	0.24	0.24	0.22	0.24	0.22	0.23	0.24	0.13	0.14	0.12	0.12	0.1	0.16	0.15	0.17	0.17	0.17
		10	0.22	0.22	0.23	0.22	0.22	0.22	0.24	0.23	0.23	0.24	0.07	0.1	0.08	0.08	0.08	0.17	0.16	0.17	0.15	0.16
		15	0.19	0.22	0.2	0.2	0.21	0.23	0.22	0.22	0.22	0.23	0.08	0.07	0.08	0.08	0.06	0.15	0.16	0.16	0.15	0.16
		20	0.21	0.2	0.22	0.22	0.21	0.24	0.22	0.24	0.22	0.23	0.07	0.07	0.06	0.06	0.06	0.14	0.13	0.14	0.14	0.16
		25	0.19	0.22	0.21	0.2	0.2	0.22	0.25	0.23	0.22	0.23	0.09	0.09	0.08	0.08	0.08	0.16	0.15	0.16	0.15	0.17
		30	0.21	0.19	0.2	0.21	0.21	0.24	0.23	0.22	0.22	0.2	0.11	0.11	0.12	0.12	0.12	0.17	0.16	0.18	0.17	0.19
Tr (mmol m-2 s-1)	2016	0	2.87	3	2.9	2.95	2.78	2.87	2.97	2.9	2.95	2.81	2.91	2.84	3.05	2.9	2.86	2.82	2.94	2.89	2.93	2.84
		5	2.89	2.76	2.91	3.09	2.87	3.09	3.04	2.89	3.07	3.02	1.77	1.87	1.66	1.61	1.68	2.1	2.1	2.25	2.23	2.24
		10	2.78	2.95	2.86	2.78	2.73	3.19	2.95	3.09	2.94	3.03	1.6	1.44	1.68	1.65	1.34	2.21	2.05	2.26	1.84	2.12
		15	2.74	2.9	2.74	2.93	2.91	3.1	3	3.18	3.14	3.04	1.37	1.36	1.51	1.37	1.09	2.18	2.29	2.16	2.02	2.38
		20	2.74	2.72	2.76	2.66	2.54	2.98	2.97	2.82	2.85	2.82	1.48	1.4	1.25	1.25	1.14	2.15	2.03	2.03	2.17	2.22
		25	2.6	2.8	2.69	2.62	2.58	2.79	3.17	2.87	2.75	2.83	1.42	1.44	1.24	1.55	1.55	2.4	2.17	2.27	2.06	2.32
		30	2.76	2.48	2.72	2.89	2.74	3.02	2.71	2.94	2.99	2.94	1.67	1.89	1.58	1.64	1.62	2.38	2.24	2.53	2.48	2.52
	2017	0	2.66	2.75	2.69	2.73	2.6	2.69	2.64	2.8	2.68	2.67	2.66	2.78	2.69	2.73	2.57	2.58	2.76	2.68	2.72	2.63
		5	2.78	2.74	2.91	2.86	2.84	2.86	2.88	2.66	2.84	2.8	1.83	1.81	1.73	1.68	1.6	2.14	2.21	2.27	2.12	1.99
		10	2.58	2.68	2.65	2.51	2.58	2.91	2.78	2.99	2.72	2.81	1.36	1.52	1.38	1.35	1.37	2.01	1.86	1.95	1.81	1.97
		15	2.67	2.91	2.73	2.88	2.88	3.15	2.87	3.13	3.1	3	1.15	1.14	1.21	1.15	0.99	1.78	2	1.87	1.81	1.94
		20	2.72	2.74	2.74	2.65	2.6	3.03	2.93	2.7	2.83	2.8	1.13	1.12	0.99	0.98	0.94	1.81	1.7	1.59	1.83	1.96
		25	2.52	2.87	2.77	2.8	2.67	2.86	3.1	2.93	2.83	2.89	1.33	1.25	1.46	1.53	1.44	2.32	2.2	2.48	2.19	2.33
		30	2.74	2.58	2.7	2.77	2.73	3.08	2.84	2.91	2.95	2.81	1.35	1.59	1.56	1.62	1.51	2.39	2.32	2.53	2.49	2.63
Ci (μmol mol-1)	2016	0	150.65	155.35	152.49	149.56	166.9	147.1	162.75	159.04	161.22	153.55	160.24	157.16	144.39	156.44	151.86	159.25	155.68	165.75	158.74	150.81
		5	150.13	143.67	161.28	150.1	149.21	168.5	155.54	150.71	157.13	154.7	102.01	107.07	96.31	93.81	83.69	130.43	145.56	137.96	136.82	122.12
		10	152.92	151.17	166.69	155.24	156.22	141.09	148.18	155.55	140.66	152.43	59.29	75.49	63.59	61.55	62.64	121.23	113.28	103.57	102.44	116.78
		15	147.83	163.32	150.89	155.04	159.26	149.83	163.74	145.65	142.89	147.09	146.25	141.82	134.07	142.28	133.15	43.93	66.24	49.24	45.91	53.29
		20	142.83	139.74	157.96	148.68	146.13	146.62	148.51	161.31	150.42	158.47	216.27	206.16	198.54	198.33	197.12	99.91	93.92	87.26	101.04	113.2
		25	130.17	150.59	145.39	151.88	139.59	148.02	167.3	152.09	146.23	149.95	170.31	166.36	177.63	181.95	176.85	128.93	116.26	121.33	115.57	123.75
		30	151.42	142.4	149.58	158.22	150.75	163.06	155.14	150.82	152.98	145.3	173.32	180.5	173.57	192.1	176.01	132.07	128.38	139.71	137.49	145.3
	2017	0	134.83	129.04	143.09	134.39	133.61	133	140.54	134.65	132.81	127.24	133.36	129.06	125.72	137.96	129.45	129.33	130.59	136.53	129.06	125.18
		5	127.1	120.72	129	127.08	126.33	133.57	128.3	121.45	129.65	127.59	61.5	62.11	56.68	54.56	49.67	110.43	119.56	116.8	115.84	107.08
		10	122.7	119.38	127.73	124.66	125.49	116.07	122.07	126.46	117.55	125.67	31.45	43.76	36.93	35.21	36.12	76.34	70.52	64.14	65.03	68.89
		15	111.91	117.81	110.82	114.33	116.06	129.61	121.7	123.31	118.22	124.54	120.43	120.07	120.13	120.46	114.57	43.85	57.94	50.18	47.36	53.6
		20	120.93	115.55	133.11	125.88	123.72	118.43	117.27	125.34	118.89	125.7	177.38	174.53	168.08	167.9	164.12	93.07	87.99	85.11	94.02	101.55
		25	104.51	118.11	114.63	118.28	109.72	117.78	130.42	120.3	117.18	118.49	144.19	138.09	150.38	156.79	149.72	112.55	106.9	111.19	105.4	116
		30	119.74	109.34	118.18	124.02	119.16	115.83	131.34	130.45	121.06	123.02	138.27	144.35	141.24	151.4	140.55	111.82	111.45	118.28	116.41	120.26

## Sheet: Sheet8
Fig. 13 data. Effects of drought and/or DCPTA treatment on isocitrate dehydrogenase (ICDH) activity in 2016 and 2017.
Indicator	Year	Day after stress	Well-watered					Well-watered					Drought					Drought+DCPTA
ICDH activity (U mg-1 Pro min-1)	2016	0	27.93	28.02	25.05	26.48	29.26	29.6	28.64	26.09	27.67	27.75	28.04	25.47	29.93	27.9	28.07	28.11	27.82	28.09	24.92	27.13
		5	27.9	24.7	28.37	27.45	26.76	28.57	26.22	29.85	27.86	30.76	26.36	24.8	28.32	26.37	27.21	27.03	25.13	28.08	26.06	29.29
		10	28.03	29.95	30.11	26.53	28.45	30.96	32.28	28.68	30.53	31.02	25.46	24.64	21.81	22.48	24.83	25.68	22.55	25.87	26.38	27.48
		15	30.36	30.26	26.41	29.02	29.82	31.67	34.99	31.23	30.78	31.44	20.1	21.05	19.68	16.81	19.18	20.94	23.46	25.07	23.96	23.08
		20	29.05	29.63	26.92	30.83	30.38	31.14	32.73	35.35	32.06	31.62	17.13	15.46	18.45	16.99	18.97	20.22	20.92	24.35	22.24	22.51
		25	27.57	30.03	31.12	30.83	30.88	31.14	32.73	33.15	34.06	32.82	16.73	17.46	18.45	19.71	18.97	20.62	23.28	24.35	22.24	22.51
		30	30.95	34.23	31.32	29.67	30.88	32.74	32.73	34.75	31.66	30.22	20.64	22.22	19.24	18.5	19.41	24.12	27.86	25.14	23.78	24.83
	2017	0	24.72	23.8	25.83	29.3	26.02	21.51	27.26	25.86	25.47	25.55	25.81	28.19	23.73	25.68	25.84	26.78	25.61	24.86	22.88	24.98
		5	25.68	29.42	26.45	26.44	24.14	25.38	22.98	27.4	25.73	28.32	21.27	18.75	22.07	20.44	22.05	21.88	20.32	24.85	21	22.86
		10	22.3	26.99	26.22	23.85	24.69	27.92	29.3	24.9	26.61	27.06	20.44	20.68	17.02	19.7	20.86	21.64	20.69	24.81	22.28	23.3
		15	24.95	28.91	27.08	25.67	27.45	29.16	30.82	31.75	28.42	28.94	18.51	16.92	18.12	14.86	17.67	19.78	22.6	23.24	21.56	21.25
		20	23.38	25.78	25.13	26.89	27.33	27.57	28.63	31.8	28.01	27.61	13.78	16.08	16.99	15.25	17.87	19.12	19.26	23.58	20.78	20.23
		25	24.67	27.65	28.83	28.39	28.43	28.77	33.13	29.6	29.51	30.61	16.28	14.58	17.49	18.28	17.97	20.62	25.8	22.58	22.48	22.73
		30	29.49	26.75	28.23	25.92	27.43	29.14	29.13	32.7	28.14	28.11	19.64	19.62	15.72	18.4	18.87	23.21	25.89	24.57	21.5	23.86

## Sheet: Sheet9
Fig. 14 data. Effects of drought and/or DCPTA treatment on the nitrate (NO3-), nitrite (NO2-) and ammonium (NH4+) contents in the leaves of maize in 2016 and 2017.
Indicator	Year	Day after stress	Well-watered					Well-watered					Drought					Drought+DCPTA
NO3- content (mmol g-1 FW)	2016	0	628.28	700.59	690.34	675.96	717.48	680.02	725.9	702.19	631.69	633.75	700.98	624.14	725.73	697.44	701.74	702.78	625.55	702.16	673	678.37
		5	697.44	717.52	711.81	633.76	678.96	689.22	705.56	731.35	631.42	729.06	659.05	644.88	697.89	619.17	680.28	675.67	653.18	731.97	631.58	682.3
		10	670.63	743.72	752.65	718.23	711.25	798.99	782.04	717	753.28	775.52	636.5	615.93	595.18	561.99	620.75	641.92	608.83	646.64	699.42	656.99
		15	758.98	761.45	735.25	680.53	745.45	791.84	809.8	820.68	731.91	785.93	502.61	503.64	491.95	417.69	479.55	543.42	586.49	576.72	639.01	577.04
		20	683.72	740.87	723.04	770.85	762.05	788.6	818.3	853.86	801.45	790.51	408.34	446.39	461.22	414.79	484.15	495.39	522.97	558.64	555.89	592.78
		25	704.19	750.87	773.04	770.85	772.05	778.6	858.3	803.86	801.45	820.51	408.34	436.39	461.22	492.78	474.15	525.39	632.03	558.64	555.89	562.78
		30	773.72	780.87	783.04	701.85	772.05	818.6	808.3	853.86	761.45	790.51	546	535.45	490.98	492.45	465.13	583.05	661.62	698.4	674.55	650.81
	2017	0	606.06	571.09	571.96	515.37	577.89	546.35	598.76	622.94	560.83	563.2	571.55	519.57	612.66	567.46	572.42	586.17	565.29	572.91	526.71	515.45
		5	567.46	590.63	607.13	528.59	534.6	583.06	576.83	615.13	562.52	637.57	397.72	381.36	416.45	347.78	422.22	479.62	430.58	509.97	451.82	510.36
		10	495.88	567.69	555.92	494.11	508.13	571.76	589.83	539.85	510.55	582.31	371.7	333.04	349.09	295.88	278.6	403.04	354.31	408.48	423.23	442.51
		15	588.31	552.53	560.92	509.85	572.69	626.23	672.04	613.35	578.14	619.4	330.07	355.34	317.77	265.69	303.47	347.82	408.06	396.79	439.96	397.15
		20	473.35	517.24	496.66	551.83	553.21	560.78	606.59	637.09	587.14	574.52	186.73	216.02	244.68	183.64	258.6	296.66	315.94	387.11	353.93	360.88
		25	535.61	578.95	628.62	602.01	603.39	598.41	656.77	640.1	637.32	691.86	269.45	236.2	294.85	307.19	309.77	358.37	453.27	407.29	404.11	412.06
		30	580.23	598.49	603.53	520.91	578.3	632.03	631.68	662.17	600.69	567.07	379.07	345.89	317.66	295.26	322.45	458.53	479.97	530.33	436.18	479.03
NO2- content (mmol g-1 FW)	2016	0	239.8	240.6	230.85	208.92	249.62	243.97	228.85	241.14	217.54	208.25	240.73	234.95	209.23	249.52	240.99	259.35	238.87	241.13	223.12	232.96
		5	279.51	246.41	241.32	237.95	229.74	226.86	232.24	233.89	241	273.14	226.33	221.46	233.1	199.2	233.62	232.04	207.45	251.07	223.76	231.19
		10	210.61	245.71	258.48	246.35	244.26	247.5	262.04	221.08	245.99	249.94	218.59	211.52	184.4	200	213.18	220.45	202.22	222.07	246.46	225.93
		15	260.65	284.93	252.5	244.01	256	265.04	231.05	241.31	268.37	263.06	172.61	176.39	168.94	137.18	164.69	179.75	221.41	198.06	205.71	198.17
		20	225.11	254.43	228.31	264.73	265.14	245.56	278.08	262.99	252.77	242.32	147.1	139.86	148.39	145.88	182.83	173.56	179.6	191.85	210.9	193.27
		25	238.7	257.87	268.91	284.73	265.14	236.97	259.56	244.98	254.22	280.27	147.1	149.86	158.39	185.8	162.83	173.56	203.31	191.85	210.9	193.27
		30	265.71	288.17	268.91	244.77	269.14	285.85	245.75	270.8	257.03	251.73	163.77	179.58	165.18	162.25	196.6	207.1	243.48	225.81	204.18	208.2
	2017	0	210.36	211.04	201.25	189.72	195.39	200.6	208.13	214.14	201.09	191.69	203.79	218.35	210.12	211.37	190.01	204.31	219.21	204.13	189.66	197.22
		5	202.76	208.6	212.75	182.97	194.48	192.05	186.6	204.93	187.09	214.29	164	159.88	177.8	149.9	170.17	176.19	164.34	193.34	169.19	183.93
		10	185.29	206.53	200.41	181.68	188.37	206.95	202.32	174.58	197.21	200.54	154.81	158.83	138.8	153.15	164.23	173.74	168.31	199.11	178.83	176.84
		15	212.25	201.87	185.35	192.17	198.32	213.33	202.41	210.16	189.68	211.65	146.13	120.33	143.03	137.07	139.43	148.34	168.67	165.83	174.31	165.92
		20	165.89	187.79	182.6	196.5	192.85	171	185.59	203.75	201.1	198.18	124.54	106.88	134.1	127.51	133.86	150.94	152.05	132.42	161.62	159.62
		25	179.94	190.69	213.04	196.5	196.85	183.19	206.85	182.97	182.33	200.44	124.54	113.88	134.1	143.37	137.86	148.94	170.12	182.42	161.62	163.62
		30	188.13	190.21	193.84	165.87	187.65	202.97	202.89	170.16	192.51	195.25	150.11	146.95	119.84	134.36	141.05	166.12	171.52	186.49	150.65	171.29
NH4+ content (mmol g-1 FW)	2016	0	33.22	36.71	34.74	35.7	28.53	29.85	33.52	36.71	36.14	35.43	36.06	32.4	35.06	30.57	33.52	29.53	34.86	37.61	34.22	36.3
		5	38.62	37.7	35.52	31.53	33.71	36.22	31.71	38.56	34.26	37.04	46.37	48.09	43.39	46.44	50.43	40.06	37.42	42.95	42.86	41.9
		10	30.22	35.86	35.17	36.9	34.83	36.58	36.87	34.58	29.99	32.82	46.74	47.06	42.03	49.42	49.74	40.52	42.01	36.98	41.98	35.45
		15	37.68	42.86	34.49	39.45	34.44	38.46	32.69	33.71	38.7	37.05	45.17	51.15	52.14	49.06	50.22	43.8	38.07	44.91	46.54	41.9
		20	33.22	28.53	34.83	36.87	37.18	33.56	36.3	41.24	35.17	35.17	50.74	56.43	51.14	49.09	52.78	41.94	45.45	35.02	40.92	42.85
		25	31.22	37.53	36.83	38.87	39.18	31.56	40.3	37.24	39.17	37.17	52.74	45.03	53.14	51.09	50.18	43.94	47.45	38.02	42.92	44.85
		30	29.22	37.53	35.83	36.87	37.18	30.56	31.3	37.24	38.17	35.17	47.74	42.03	46.14	44.09	48.18	42.94	40.45	35.02	39.92	41.85
	2017	0	34.59	43.46	40.73	42.71	37.51	35.88	34.2	38.69	43.63	42.16	42.35	34.88	41.4	43.23	38.2	42.78	36.47	41.05	47.16	39.46
		5	39.01	38.21	33.7	31.66	31.08	35.16	36.17	41.12	29.98	36.86	61.02	64.58	56.07	61.17	68.22	42.33	51.55	49.45	49.26	47.28
		10	33.05	40.75	39.32	45.17	38.62	42.25	43.98	38.1	34.81	33.35	65.93	66.6	62.21	71.48	74.39	49.67	52.77	57.98	52.71	46.34
		15	35.3	27.32	31.67	38.04	32.38	39.8	31.82	36.17	42.54	36.88	66.82	70.93	75.22	64.35	68.99	51.21	47.63	54.63	56.88	46.16
		20	33.09	32.78	36.41	40.65	40.16	33.79	41.72	30.87	37.11	37.11	74.21	64.91	75.04	70.8	78.82	52.61	59.22	49.33	50.51	54.5
		25	30.21	34.27	32.81	37.05	39.04	30.73	37.76	30.06	34.05	28.56	69.71	62.48	70.09	66.3	64.42	51.49	57.87	48.43	49.39	53.38
		30	32.28	41.56	35.78	37.95	38.59	33.34	38.3	42.3	45.57	38.01	63.5	66.17	58.84	67.65	64.42	53.56	48.42	47.53	45.74	52.88

## Sheet: Sheet10
Fig. 15 data. Effects of drought and/or DCPTA treatment on nitrate reductase (NR) and nitrite reductase (NiR) activities in the leaves of maize in 2016 and 2017.
Indicator	Year	Day after stress	Well-watered					Well-watered					Drought					Drought+DCPTA
NR activity (mmol NO2- mg-1 FW h-1)	2016	0	0.2616	0.297	0.276	0.29	0.2812	0.2822	0.3094	0.2746	0.2846	0.2846	0.287	0.2964	0.2822	0.2552	0.2846	0.2846	0.2946	0.2646	0.2822	0.2994
		5	0.2924	0.2837	0.2994	0.314	0.3142	0.296	0.2766	0.2904	0.3124	0.3114	0.2469	0.2451	0.2475	0.2327	0.2154	0.2846	0.297	0.2846	0.2622	0.2722
		10	0.3174	0.2766	0.3094	0.3176	0.3142	0.3488	0.3182	0.3074	0.3449	0.334	0.2	0.2236	0.2343	0.24	0.2404	0.2858	0.299	0.2816	0.2512	0.2712
		15	0.3314	0.316	0.2837	0.3196	0.3214	0.334	0.368	0.3834	0.3342	0.3463	0.2068	0.2144	0.1956	0.178	0.2104	0.297	0.2722	0.2846	0.2422	0.2722
		20	0.3217	0.2894	0.3341	0.3217	0.3341	0.334	0.3726	0.3389	0.344	0.3549	0.1928	0.168	0.1856	0.198	0.2104	0.2816	0.2741	0.2367	0.2858	0.2741
		25	0.324	0.285	0.3314	0.3274	0.3214	0.3634	0.346	0.3359	0.3734	0.3518	0.2167	0.178	0.1916	0.198	0.2104	0.2858	0.294	0.264	0.3065	0.288
		30	0.3296	0.3205	0.3142	0.324	0.362	0.3834	0.3613	0.3389	0.3434	0.3488	0.2424	0.2136	0.219	0.1936	0.2137	0.3094	0.3094	0.2896	0.3094	0.2546
	2017	0	0.2569	0.305	0.277	0.2652	0.2652	0.2625	0.2466	0.2758	0.2864	0.2559	0.2766	0.303	0.2569	0.2559	0.2652	0.2652	0.3152	0.2652	0.2569	0.285
		5	0.2706	0.2636	0.2388	0.2741	0.2825	0.2658	0.2625	0.2606	0.3054	0.2799	0.1633	0.1989	0.2011	0.1875	0.188	0.2502	0.2216	0.2202	0.2189	0.2089
		10	0.232	0.2552	0.268	0.2674	0.2725	0.3096	0.2825	0.2754	0.2944	0.2907	0.1408	0.1311	0.1639	0.1692	0.1595	0.2063	0.2168	0.2025	0.2029	0.179
		15	0.2733	0.2412	0.2578	0.2674	0.2691	0.2807	0.2844	0.3177	0.2909	0.292	0.1587	0.1265	0.1504	0.1506	0.1619	0.2116	0.1939	0.236	0.1969	0.1959
		20	0.232	0.255	0.2668	0.2594	0.2678	0.2727	0.292	0.317	0.2799	0.2879	0.1108	0.1064	0.148	0.1156	0.1239	0.1925	0.1856	0.1765	0.2193	0.1856
		25	0.22	0.251	0.2713	0.2546	0.2491	0.2877	0.2717	0.246	0.2785	0.2835	0.16	0.1156	0.1042	0.1156	0.1269	0.2063	0.188	0.2017	0.2284	0.2084
		30	0.2466	0.26	0.2365	0.22	0.262	0.2685	0.2818	0.2492	0.228	0.2643	0.163	0.1499	0.178	0.1265	0.15	0.203	0.228	0.2098	0.228	0.1902
NiR activity (mmol NO2- mg-1 FW min-1)	2016	0	0.2824	0.3374	0.3146	0.3146	0.3146	0.3216	0.2999	0.336	0.328	0.3032	0.327	0.3474	0.3022	0.3042	0.3146	0.3146	0.3146	0.3146	0.2842	0.3374
		5	0.3024	0.3237	0.3294	0.344	0.3442	0.326	0.2936	0.3204	0.3454	0.3414	0.2779	0.2751	0.2775	0.2627	0.2344	0.3146	0.327	0.3146	0.2822	0.3022
		10	0.3474	0.2962	0.3394	0.3476	0.3442	0.3748	0.3482	0.3274	0.3789	0.364	0.25	0.2336	0.2643	0.27	0.2704	0.3158	0.329	0.3116	0.3012	0.2812
		15	0.3614	0.346	0.3137	0.3496	0.3514	0.364	0.368	0.4134	0.3642	0.3763	0.2368	0.2444	0.2056	0.228	0.2404	0.327	0.2822	0.3146	0.3022	0.3022
		20	0.3517	0.3194	0.3641	0.3517	0.3641	0.364	0.3826	0.3689	0.374	0.4049	0.2228	0.218	0.1956	0.228	0.2404	0.3116	0.3041	0.2667	0.3158	0.3041
		25	0.354	0.315	0.3614	0.3574	0.3514	0.4114	0.376	0.3609	0.3834	0.3888	0.2467	0.198	0.2216	0.228	0.2404	0.3158	0.324	0.314	0.3365	0.288
		30	0.3596	0.3505	0.3342	0.354	0.372	0.3834	0.3913	0.3389	0.3534	0.3788	0.2824	0.2436	0.249	0.2236	0.2437	0.3394	0.3394	0.2996	0.3394	0.3146
	2017	0	0.2737	0.2867	0.3159	0.2822	0.2719	0.2728	0.3102	0.2762	0.2762	0.2762	0.3027	0.2862	0.2618	0.2688	0.2722	0.2762	0.2762	0.2762	0.2728	0.3102
		5	0.2503	0.2971	0.2519	0.26	0.2645	0.2675	0.2613	0.2627	0.3096	0.2805	0.204	0.236	0.208	0.1955	0.1928	0.221	0.2595	0.221	0.2126	0.2106
		10	0.2672	0.2454	0.2604	0.263	0.2945	0.2938	0.2705	0.2772	0.3178	0.2812	0.1907	0.1878	0.2268	0.1957	0.202	0.222	0.2572	0.2185	0.2157	0.2097
		15	0.2546	0.2376	0.2431	0.2106	0.2522	0.2628	0.2662	0.3117	0.269	0.2733	0.192	0.1924	0.1885	0.151	0.195	0.2265	0.2156	0.241	0.2106	0.2106
		20	0.2432	0.2288	0.2477	0.2432	0.2722	0.2696	0.2694	0.3078	0.2621	0.2853	0.1392	0.176	0.17	0.1845	0.1644	0.2185	0.2121	0.1934	0.246	0.2121
		25	0.2451	0.2051	0.2654	0.248	0.243	0.2785	0.2638	0.2232	0.27	0.2746	0.2055	0.1845	0.1592	0.1845	0.195	0.222	0.229	0.1956	0.2375	0.2239
		30	0.2699	0.2422	0.2329	0.2451	0.2644	0.27	0.2807	0.2538	0.2316	0.2662	0.2012	0.1977	0.2229	0.1679	0.1978	0.242	0.262	0.2252	0.246	0.2171

[truncated: 3 more sheets: Sheet11, Sheet12, Sheet13]
